# Supplementary material for: SERS investigation of ciprofloxacin drug molecules on TiO2 nanoparticles
Source: Royal Society of Chemistry journal article supplement (doi:10.1039/c5cp02666k), 2015-01-01
Supplement: c5cp02666k1.pdf [file c5cp02666k1.pdf]

## SERS investigation of ciprofloxacin drug molecules on TiO<sub>2</sub> nanoparticles

Libin Yang,<sup>abc</sup> Xiaoyu Qin,<sup>c</sup> Xin Jiang,<sup>bc</sup> Mengdi Gong,<sup>c</sup> Di Yin,<sup>c</sup> Yingjiu  
Zhang,<sup>\*a</sup> Bing Zhao<sup>\*b</sup>

*a Key Laboratory for Molecular Enzymology and Engineering of the Ministry of  
Education, Jilin University, Changchun 130012, People's Republic of China*

*b State Key Laboratory of Supramolecular Structure and Materials, Jilin University,  
Changchun 130012, People's Republic of China*

*c College of pharmacy, Jiamusi University, Jiamusi 154007, People's Republic of  
China*

\* Corresponding authors.

E-mail: zhaob@mail.jlu.edu.cn (B. Z.); yingjiu@jlu.edu.cn (Y.J.Z.)

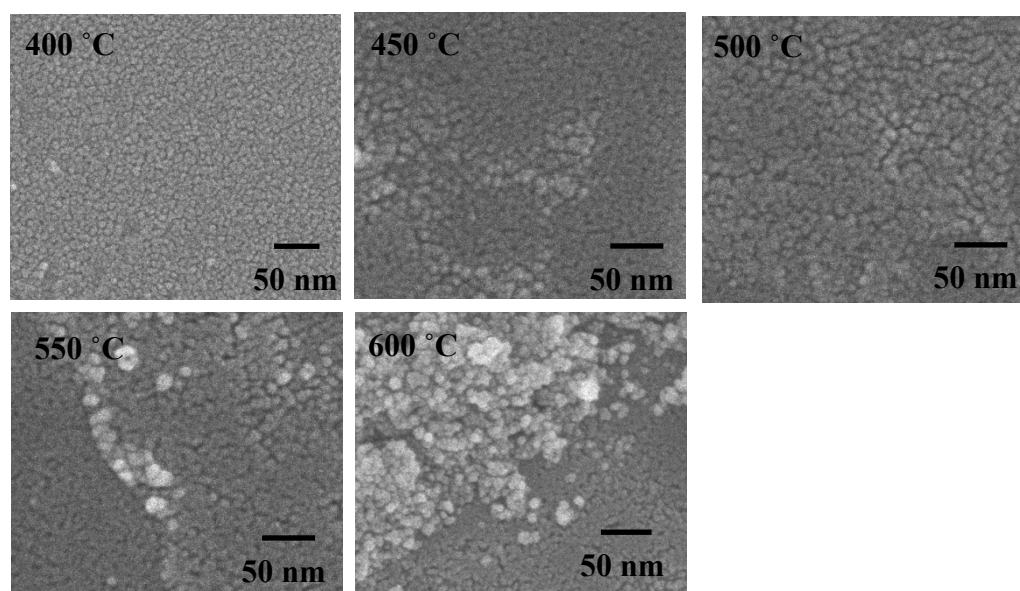

**Fig. S1 The SEM images of TiO<sub>2</sub> nanoparticles with different calcined  
temperatures.**
